# Supplementary material for: Characterization of Nero Antico di Pretalucente Wine and Grape Fungal Microbiota: An Expression of Abruzzo Region Cultivar Heritage
Source: MDPI journal article supplement (doi:10.3390/fermentation9020150), 2023-02-03
Supplement: s1 [file s1]

**Table S1.** Descriptors proposed by the International Organisation of Vine and Wine (OIV, 2007) for the description of young shoots, shoots, young leaves, adult leaves, bunches and berries in one black-berried grapevine accession from the Abruzzo Region.

| <b>Code</b> | <b>Descriptor</b>                                                                     | <b>Nero Antico di Pretalucence</b> |
|-------------|---------------------------------------------------------------------------------------|------------------------------------|
| OIV 001     | Young shoot: opening of the shoot tip                                                 | Half open                          |
| OIV 002     | Young shoot: intensity of anthocyanin colouration on prostrate hairs of the shoot tip | Absent                             |
| OIV 004     | Young shoot: density of prostrate hairs on the shoot tip                              | Very low                           |
| OIV 006     | Shoot: attitude (before tying)                                                        | Semi-erect                         |
| OIV 007     | Shoot: colour of the dorsal side of internodes                                        | Green                              |
| OIV 008     | Shoot: colour of the ventral side of internodes                                       | Green and red                      |
| OIV 016     | Shoot: number of consecutive tendrils                                                 | 1-2 or less                        |
| OIV 051     | Young leaf: colour of upper side of the blade (4th leaf)                              | Green                              |
| OIV 065     | Mature leaf: size of blade                                                            | Large                              |
| OIV 067     | Mature leaf: shape of blade                                                           | Circular                           |
| OIV 068     | Mature leaf: number of lobes                                                          | Five                               |
| OIV 069     | Mature leaf: colour of upper side of the blade                                        | Medium green                       |
| OIV 080     | Mature leaf: shape of base of petiole sinus                                           | Brace-Shaped ({} )                 |
| OIV 202     | Bunch: length (peduncle excluded)                                                     | Medium                             |
| OIV 204     | Bunch: density                                                                        | Loose                              |
| OIV 208     | Bunch: shape                                                                          | Conical                            |
| OIV 223     | Berry: shape                                                                          | Globose                            |
| OIV 225     | Berry: color of skin                                                                  | Blue black                         |
| OIV 241     | Berry: formation of seeds                                                             | Complete                           |
