# Supplementary material for: Characterization of Nero Antico di Pretalucente Wine and Grape Fungal Microbiota: An Expression of Abruzzo Region Cultivar Heritage
Source: MDPI journal article supplement (doi:10.3390/fermentation9020150), 2023-02-03
Supplement: s1 [file s1]

Archive with 1 entries (1 files):
- fermentation-2104145-supplementary.pdf
